# Supplementary material for: Development and evaluation of the Parenting to Reduce Child Anxiety and Depression Scale (PaRCADS): assessment of parental concordance with guidelines for the prevention of child anxiety and depression
Source: PubMed Central journal article supplement (PMC6545230; doi:10.7717/peerj.6865), 2019-05-30
Supplement: peerj-07-6865-s002.pdf [file peerj-07-6865-s002.pdf]

**Supplemental File S2:**

**Item statistics – content validity indices and discrimination indices**

| Item               | Item-objective congruence | I-CVI<br>Item relevance<br>(Subscale-CVI/Ave) | Item facility/<br>Difficulty index | Corrected<br>item-total point-<br>biserial correlation<br>$r_{pb}$ | B-index |
|--------------------|---------------------------|-----------------------------------------------|------------------------------------|--------------------------------------------------------------------|---------|
| 1.1                | 1                         | 1                                             | .94                                | .19                                                                | .01     |
| 1.2                | .83                       | 1                                             | .92                                | .20                                                                | .08     |
| 1.3                | .83                       | .83                                           | .88                                | .37                                                                | .13     |
| 1.4                | 1                         | .83                                           | .88                                | .27                                                                | .08     |
| 1.5                | 1                         | 1                                             | .76                                | .38                                                                | .25     |
| 1.6 <sup>a</sup>   | 1                         | .67                                           | .87                                | .17                                                                | .08     |
| 1.7                | .83                       | .83                                           | .30                                | .32                                                                | .42     |
| 1.8 <sup>a,b</sup> | .83                       | .83 (.87)                                     | .28                                | .27                                                                | .45     |
| 2.1                | 1                         | 1                                             | .42                                | .27                                                                | .41     |
| 2.2                | 1                         | 1                                             | .66                                | .25                                                                | .26     |
| 2.3                | 1                         | 1                                             | .92                                | .23                                                                | .08     |
| 2.4                | .67                       | .83                                           | .79                                | .20                                                                | .16     |
| 2.5                | .67                       | .83                                           | .86                                | .24                                                                | .10     |
| 2.6                | .83                       | .83                                           | .83                                | .28                                                                | .18     |
| 2.7 <sup>a</sup>   | .83                       | .67                                           | .73                                | .11                                                                | .07     |
| 2.8                | 1                         | 1                                             | .83                                | .27                                                                | .18     |
| 2.9                | 1                         | 1                                             | .44                                | .40                                                                | .44     |
| 2.10 <sup>a</sup>  | 1                         | 1 (.92)                                       | .21                                | .24                                                                | .31     |
| 3.1                | .83                       | .67                                           | .73                                | .29                                                                | .24     |
| 3.2                | .83                       | .67                                           | .39                                | .26                                                                | .27     |
| 3.3 <sup>a,b</sup> | .33                       | .33                                           | .59                                | .15                                                                | .06     |
| 3.4                | 1                         | .83                                           | .78                                | .45                                                                | .23     |
| 3.5                | 1                         | .67                                           | .56                                | .27                                                                | .37     |
| 3.6                | 1                         | 1                                             | .46                                | .25                                                                | .36     |
| 3.7                | 1                         | .83 (.71)                                     | .74                                | .26                                                                | .28     |
| 4.1                | .83                       | 1                                             | .56                                | .25                                                                | .25     |
| 4.2                | 1                         | 1                                             | .35                                | .32                                                                | .37     |
| 4.3                | .50                       | .67                                           | .12                                | .18                                                                | .14     |
| 4.4                | 1                         | 1                                             | .64                                | .40                                                                | .33     |
| 4.5                | 1                         | 1                                             | .55                                | .46                                                                | .42     |
| 4.6 <sup>a</sup>   | 1                         | 1                                             | .33                                | .38                                                                | .34     |
| 4.7 <sup>a</sup>   | 1                         | .83                                           | .23                                | .26                                                                | .34     |
| 4.8                | .67                       | .83                                           | .53                                | .35                                                                | .40     |
| 4.9                | 1                         | 1 (.93)                                       | .92                                | .26                                                                | .09     |
| 5.1                | 1                         | .67                                           | .59                                | .35                                                                | .44     |
| 5.2 <sup>a</sup>   | 1                         | .67                                           | .15                                | .12                                                                | .32     |
| 5.3                | 1                         | .67                                           | .34                                | .22                                                                | .27     |
| 5.4                | 1                         | .83                                           | .47                                | .25                                                                | .24     |
| 5.5 <sup>a</sup>   | 1                         | 1                                             | .62                                | .12                                                                | .14     |
| 5.6 <sup>a,b</sup> | .67                       | .33                                           | .43                                | .02                                                                | -.14    |
| 5.7                | 1                         | 1                                             | .57                                | .25                                                                | .24     |
| 5.8                | 1                         | 1 (.77)                                       | .36                                | .29                                                                | .31     |

*Note.* I-CVI = Item content validity index. S-CVI/Ave = Subscale content validity index computed by averaging I-CVIs in the subscale. B-index = difference between the item facility of those who scored above the cut-point for concordance and the item facility of those who scored below the cut-point.

<sup>a</sup> False-positive item. <sup>b</sup> Item removed in the revised PaRCADS.

| Item                | Item-objective congruence | I-CVI item relevance (S-CVI/Ave) | Item facility/<br>Difficulty index | Corrected item-total point-biserial correlation $r_{pb}$ | B-index |
|---------------------|---------------------------|----------------------------------|------------------------------------|----------------------------------------------------------|---------|
| 6.1                 | 1                         | 1                                | .67                                | .49                                                      | .35     |
| 6.2 <sup>a</sup>    | 1                         | 1                                | .18                                | .20                                                      | .13     |
| 6.3                 | .67                       | .67                              | .73                                | .30                                                      | .29     |
| 6.4 <sup>a</sup>    | .67                       | .50                              | .13                                | .25                                                      | .34     |
| 6.5                 | 1                         | 1                                | .53                                | .28                                                      | .29     |
| 6.6                 | 1                         | 1                                | .62                                | .38                                                      | .30     |
| 6.7                 | 1                         | .83                              | .94                                | .09                                                      | .06     |
| 6.8 <sup>a</sup>    | 1                         | 1                                | .80                                | .27                                                      | .21     |
| 6.9 <sup>a</sup>    | 1                         | 1                                | .53                                | .27                                                      | .29     |
| 6.10 <sup>a</sup>   | .83                       | .83 (.88)                        | .82                                | .28                                                      | .19     |
| 7.1                 | 1                         | 1                                | .52                                | .44                                                      | .51     |
| 7.2                 | .83                       | .67                              | .68                                | .30                                                      | .29     |
| 7.3 <sup>a</sup>    | 1                         | 1                                | .79                                | .21                                                      | .17     |
| 7.4 <sup>a</sup>    | 1                         | 1                                | .27                                | .32                                                      | .51     |
| 7.5                 | 1                         | .83                              | .78                                | .15                                                      | -.03    |
| 7.6 <sup>a</sup>    | 1                         | 1                                | .15                                | .30                                                      | .48     |
| 7.7                 | .83                       | .67 (.88)                        | .78                                | .36                                                      | .23     |
| 8.1                 | 1                         | 1                                | .71                                | .40                                                      | .20     |
| 8.2                 | 1                         | 1                                | .76                                | .46                                                      | .26     |
| 8.3                 | 1                         | 1                                | .58                                | .41                                                      | .34     |
| 8.4                 | .83                       | .83                              | .74                                | .44                                                      | .27     |
| 8.5 <sup>a</sup>    | .83                       | .67                              | .82                                | .26                                                      | .19     |
| 8.6 <sup>a</sup>    | 1                         | 1                                | .76                                | .15                                                      | .20     |
| 8.7                 | 1                         | 1                                | .67                                | .39                                                      | .30     |
| 8.8                 | 1                         | .83 (.92)                        | .94                                | .14                                                      | .01     |
| 9.1                 | 1                         | 1                                | .87                                | .44                                                      | .14     |
| 9.2                 | .83                       | .50                              | .87                                | .27                                                      | .14     |
| 9.3                 | 1                         | 1                                | .75                                | .35                                                      | .26     |
| 9.4 <sup>a</sup>    | 1                         | 1                                | .52                                | .20                                                      | .40     |
| 9.5                 | 1                         | 1                                | .75                                | .46                                                      | .21     |
| 9.6 <sup>a</sup>    | .83                       | .67                              | .47                                | .16                                                      | .14     |
| 9.7                 | 1                         | 1                                | .65                                | .33                                                      | .32     |
| 9.8                 | 1                         | 1                                | .82                                | .31                                                      | .19     |
| 9.9                 | 1                         | 1                                | .54                                | .43                                                      | .38     |
| 9.10 <sup>a</sup>   | 1                         | 1 (.92)                          | .31                                | .13                                                      | .09     |
| 10.1                | 1                         | 1                                | .99                                | .16                                                      | .02     |
| 10.2 <sup>a</sup>   | 1                         | .83                              | .88                                | .23                                                      | .13     |
| 10.3                | 1                         | 1                                | .97                                | .08                                                      | .03     |
| 10.4                | 1                         | 1                                | .86                                | .11                                                      | .15     |
| 10.5                | 1                         | .83                              | .83                                | .20                                                      | .03     |
| 10.6 <sup>a,b</sup> | 1                         | .67 (.89)                        | .45                                | .15                                                      | .26     |

Note. I-CVI = Item content validity index. S-CVI/Ave = Subscale content validity index computed by averaging I-CVIs in the subscale. B-index = the difference between the item facility of those who scored above the cut-point for concordance and the item facility of those who scored below the cut-point.

<sup>a</sup> False-positive item. <sup>b</sup> Item removed in the revised PaRCADS.
