# Supplementary material for: Development and evaluation of the Parenting to Reduce Child Anxiety and Depression Scale (PaRCADS): assessment of parental concordance with guidelines for the prevention of child anxiety and depression
Source: PubMed Central journal article supplement (PMC6545230; doi:10.7717/peerj.6865), 2019-05-30
Supplement: peerj-07-6865-s003.pdf [file peerj-07-6865-s003.pdf]

**Supplemental Table S1:****Descriptive statistics for parent-reported mental health characteristics and concerns about child's risk  
(N = 355)**

|                                                                                                                   | <i>N</i> | %    |
|-------------------------------------------------------------------------------------------------------------------|----------|------|
| <b>Parent history of mental health problem</b>                                                                    |          |      |
| No                                                                                                                | 123      | 34.6 |
| Yes, past only                                                                                                    | 169      | 47.6 |
| Yes, current for at least 2 weeks                                                                                 | 21       | 5.9  |
| Yes, past and current                                                                                             | 42       | 11.8 |
| <b>Parent history of mental health diagnosis, past or current<sup>a</sup></b>                                     |          |      |
| Depression                                                                                                        | 66       | 18.6 |
| Anxiety                                                                                                           | 111      | 31.3 |
| Others (e.g. attention, relationship problems)                                                                    | 116      | 32.7 |
| None                                                                                                              | 123      | 34.6 |
| <b>Parental concerns about child's risk of developing depression</b>                                              |          |      |
| Not at all                                                                                                        | 54       | 15.2 |
| A little                                                                                                          | 175      | 49.3 |
| Yes                                                                                                               | 73       | 20.6 |
| Very much so                                                                                                      | 53       | 14.9 |
| <b>Parental concerns about child's risk of developing anxiety</b>                                                 |          |      |
| Not at all                                                                                                        | 41       | 11.5 |
| A little                                                                                                          | 143      | 40.3 |
| Yes                                                                                                               | 92       | 25.9 |
| Very much so                                                                                                      | 79       | 22.3 |
| <b>Child history of mental health or behavioural diagnosis<sup>a</sup></b>                                        |          |      |
| Depression                                                                                                        | 2        | 0.6  |
| Any anxiety disorder                                                                                              | 31       | 8.7  |
| Autism                                                                                                            | 14       | 3.9  |
| Asperger's disorder                                                                                               | 9        | 2.5  |
| Attention-deficit/hyperactivity disorder                                                                          | 22       | 6.2  |
| Intellectual disability                                                                                           | 2        | 0.6  |
| Oppositional defiant disorder                                                                                     | 5        | 1.4  |
| Conduct disorder                                                                                                  | 1        | 0.3  |
| Other (e.g. learning disorder, anger)                                                                             | 116      | 32.7 |
| Child has never been diagnosed, however I believe my child has experienced some emotional or behavioural problems | 211      | 59.4 |
| <b>Child current mental health or behavioural problem<sup>a</sup></b>                                             |          |      |
| Depression                                                                                                        | 5        | 1.4  |
| Any anxiety disorder                                                                                              | 33       | 9.3  |
| Autism                                                                                                            | 13       | 3.7  |
| Asperger's disorder                                                                                               | 9        | 2.5  |
| Attention-deficit/hyperactivity disorder                                                                          | 24       | 6.8  |
| Intellectual disability                                                                                           | 2        | 0.6  |
| Oppositional defiant disorder                                                                                     | 4        | 1.1  |
| Conduct disorder                                                                                                  | 1        | 0.3  |
| Other (e.g. learning disorder, Tic disorder, anger, stress, etc.)                                                 | 83       | 23.4 |
| No formal diagnosis, however I believe [he/she] is experiencing some emotional or behavioural problems            | 36       | 10.1 |
| No current mental health or behavioural problems                                                                  | 195      | 54.9 |

*Note.* Percentages are based on parents' report, regardless of their child's participation in the study.

<sup>a</sup>Percentages exceed 100% as multiple responses were allowed.
