# Supplementary material for: Development and evaluation of the Parenting to Reduce Child Anxiety and Depression Scale (PaRCADS): assessment of parental concordance with guidelines for the prevention of child anxiety and depression
Source: PubMed Central journal article supplement (PMC6545230; doi:10.7717/peerj.6865), 2019-05-30
Supplement: peerj-07-6865-s004.pdf [file peerj-07-6865-s004.pdf]

**Supplemental Table S2:  
Means, Standard Deviations, and *t*-test Results Comparing PaRCADS Total Scores for Participants Above  
and Below Borderline/Clinical Cut-off on the RCADS-25**

|                           | <i>n</i> | <i>M</i> | <i>SD</i> | <i>t</i> | <i>df</i> | <i>p</i> | Hedges <i>g</i> |
|---------------------------|----------|----------|-----------|----------|-----------|----------|-----------------|
| <b>RCADS-P Anxiety</b>    |          |          |           | .64*     | 71.10     | .525     | -0.08           |
| Normal                    | 309      | 50.72    | 10.94     |          |           |          |                 |
| Borderline/Clinical       | 46       | 49.85    | 8.23      |          |           |          |                 |
| <b>RCADS-P Depression</b> |          |          |           | 2.81     | 353       | .005     | -0.37           |
| Normal                    | 280      | 51.42    | 10.61     |          |           |          |                 |
| Borderline/Clinical       | 75       | 47.57    | 10.21     |          |           |          |                 |
| <b>RCADS-P Total</b>      |          |          |           | 2.64     | 353       | .009     | -0.37           |
| Normal                    | 294      | 51.28    | 10.57     |          |           |          |                 |
| Borderline/Clinical       | 61       | 47.36    | 10.39     |          |           |          |                 |
| <b>RCADS-C Anxiety</b>    |          |          |           | 1.29     | 340       | .198     | -0.34           |
| Normal                    | 327      | 52.18    | 10.90     |          |           |          |                 |
| Borderline/Clinical       | 15       | 48.47    | 10.70     |          |           |          |                 |
| <b>RCADS-C Depression</b> |          |          |           | -.41*    | 20.90     | .687     | 0.06            |
| Normal                    | 326      | 51.98    | 11.09     |          |           |          |                 |
| Borderline/Clinical       | 16       | 52.63    | 5.77      |          |           |          |                 |
| <b>RCADS-C Total</b>      |          |          |           | -.24     | 340       | .812     | 0.06            |
| Normal                    | 324      | 51.98    | 11.05     |          |           |          |                 |
| Borderline/Clinical       | 18       | 52.61    | 7.89      |          |           |          |                 |

*Note.* \*equal variances not assumed.
